# Supplementary material
Source: publisher figshare collection journal article supplement (https://brill.figshare.com/ndownloader/files/9294742)
Supplement: Supplementary file 1 [file 9294742]

## **Auditory Rhythms Influence Judged Time to Contact of an Occluded Moving Object**

**Chayada Chotsrisuparat\*, Arno Koning, Richard Jacobs and Rob van Lier**

Radboud University, Donders Institute for Brain, Cognition and Behaviour,  
Nijmegen, The Netherlands

### **Supplemental Information**

The JTTC/ATTC ratios in each experiment revealed an inverted U-curve as a function of Disk speed. In other words, the overestimation of the TTC was strongest for the middle disk speeds as shown in Figs. S1-S3.

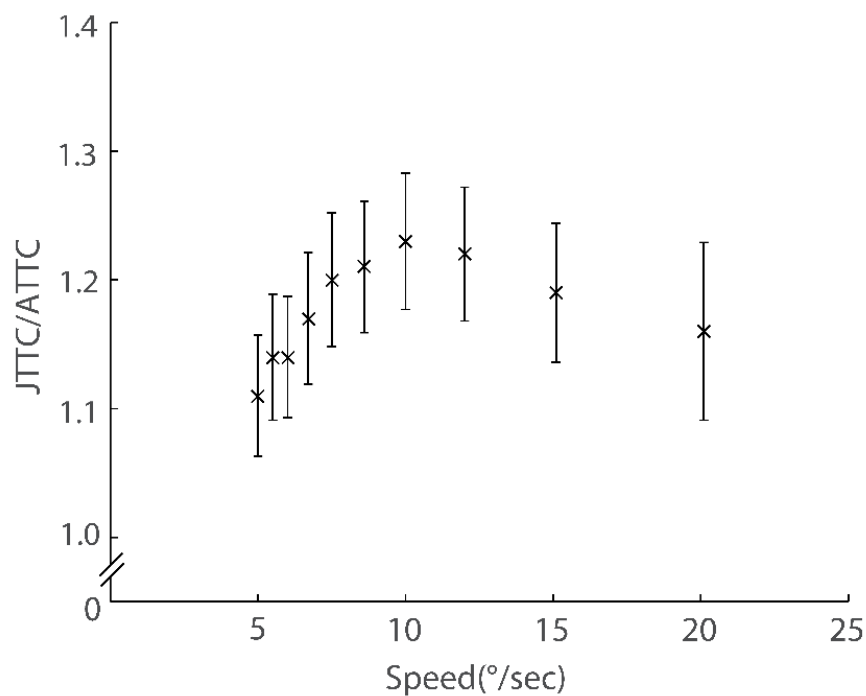

**Figure S1.** Average JTTC/ATTC ratios as a function of Disk speed for Experiment 1. The used Disk speeds were: 5.0°/s, 5.5°/s, 6.0°/s, 6.7°/s, 7.5°/s, 8.6°/s, 10.0°/s, 12.0°/s, 15.1°/s, and 20.1°/s. The error bars indicate +/- 1 SEM.

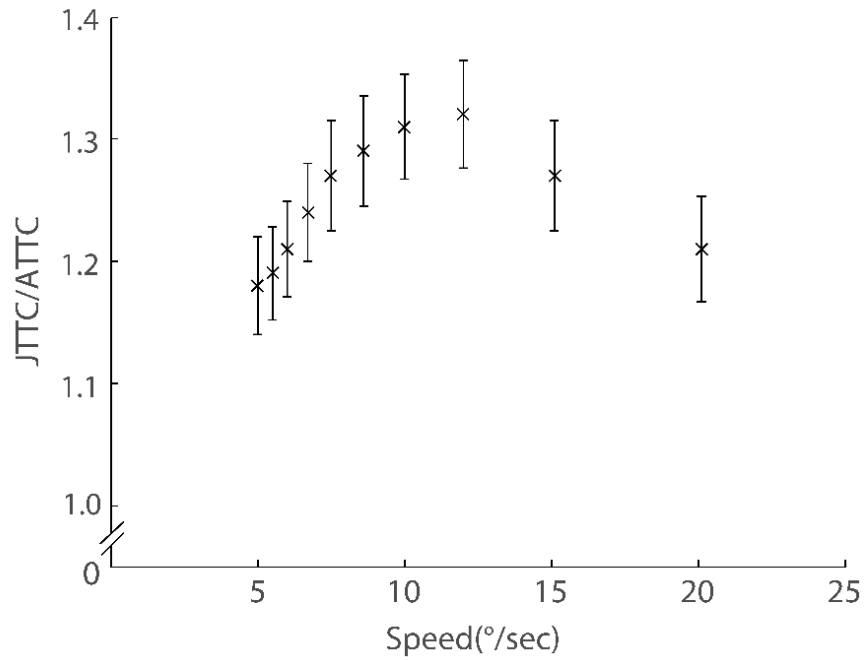

**Figure S2.** Average JTTC/ATTC ratios as a function of Disk speed for Experiment 2. The used Disk speeds were the same as in Experiment 1. The error bars indicate  $\pm 1$  SEM.

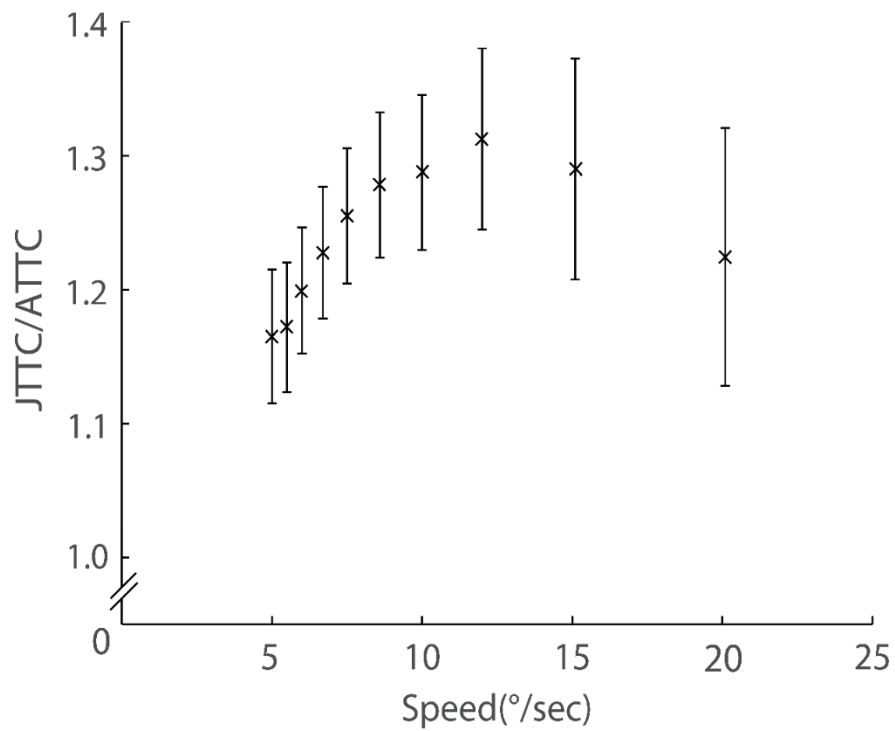

**Figure S3.** Average JTTC/ATTC ratios as a function of Disk speed for Experiment 3. The used Disk speeds were the same as in Experiment 1. The error bars indicate  $\pm 1$  SEM.
